# Supplementary material for: Ubiquitin-Specific Protease 3 Deubiquitinates and Stabilizes Oct4 Protein in Human Embryonic Stem Cells
Source: MDPI journal article supplement (doi:10.3390/ijms22115584), 2021-05-25

## **Supplementary Figures**

### **Ubiquitin-specific protease 3 deubiquitinates and stabilizes Oct4 protein in human embryonic stem cells**

Byung Ho Rhie<sup>1</sup>, Ainsley Mike Antao<sup>1</sup>, Janardhan Keshav Karapurkar<sup>1</sup>, Minseong Kim<sup>1</sup>,  
Won Jun Jo<sup>1</sup>, Suresh Ramakrishna<sup>1,2\*</sup>, and Kye-Seong Kim<sup>1,2\*</sup>

<sup>1</sup>Graduate School of Biomedical Science and Engineering, Hanyang University, Seoul  
04763, South Korea

<sup>2</sup>College of Medicine, Hanyang University, Seoul 04763, South Korea

*Running title: USP3 regulates Oct4 protein turnover in stem cells*

#### **\*Corresponding authors**

SR (E-mail: suri28@hanyang.ac.kr, suresh.ramakris@gmail.com);

KS (E-mail: ks66kim@hanyang.ac.kr)

## **Table of Contents**

**Figure S1.** Deubiquitination of Myc-Oct4 by USP3.

**Figure S2.** The original uncropped images for immunoblots in the main figures.

**Figure S3.** Triplicate images of western blots for significance values.

**Supplementary Figure S1.** Deubiquitination of Myc-Oct4 by USP3.

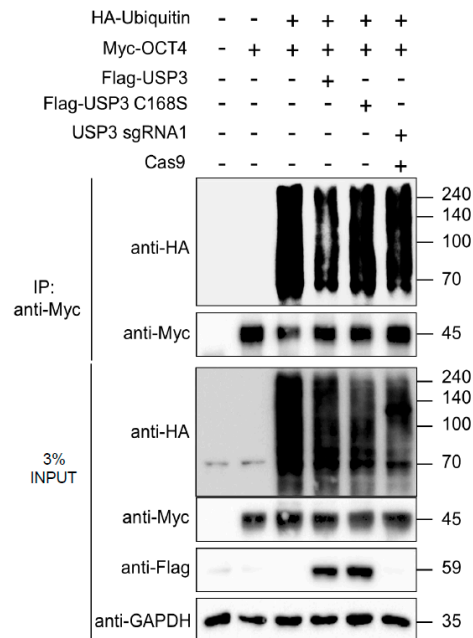

**Supplementary Figure S1:** Deubiquitinating effect of USP3 on exogenous Oct4 was analyzed by transfecting Myc-Oct4 and HA-Ubiquitin along with Flag-USP3, Flag-USP3CS, or sgRNA targeting USP3 into HEK293 cells. Oct4 deubiquitination was confirmed by IP with anti-Myc antibody and immunoblotted with anti-HA antibody.

**Supplementary Fig. S2:** The original uncropped images for immunoblots in the main figures.

**Supplementary Figure S1**

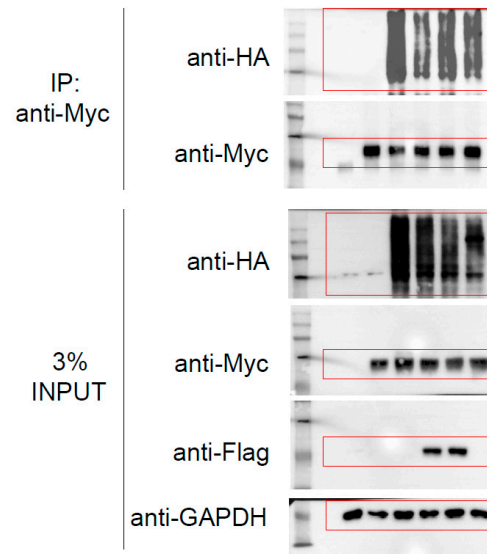

**Figure 1E**

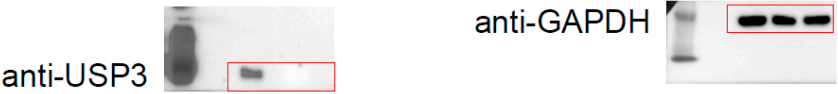

**Figure 2A**

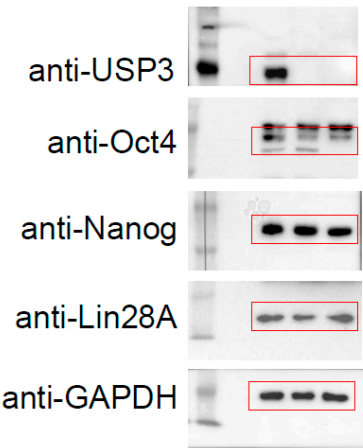

**Figure 2B**

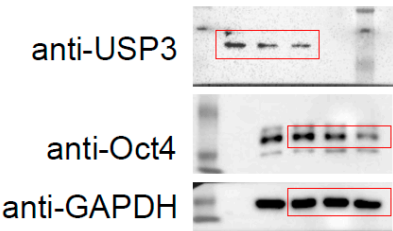

**Figure 2C**

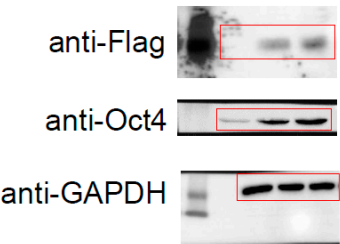

**Figure 2D**

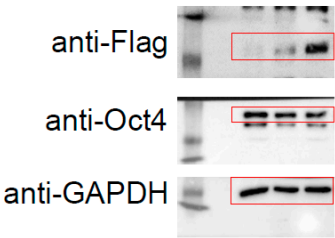

**Figure 2E**

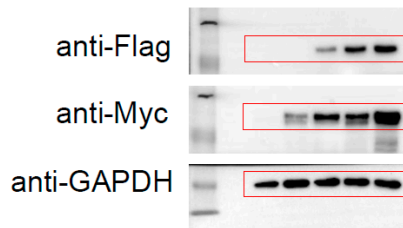

**Figure 2F**

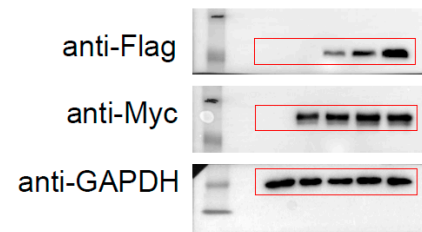

**Figure 2G**

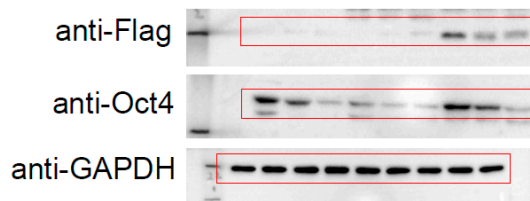

**Figure 2H**

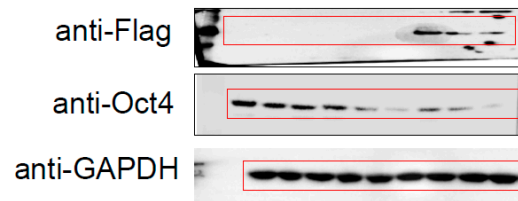

**Figure 3A**

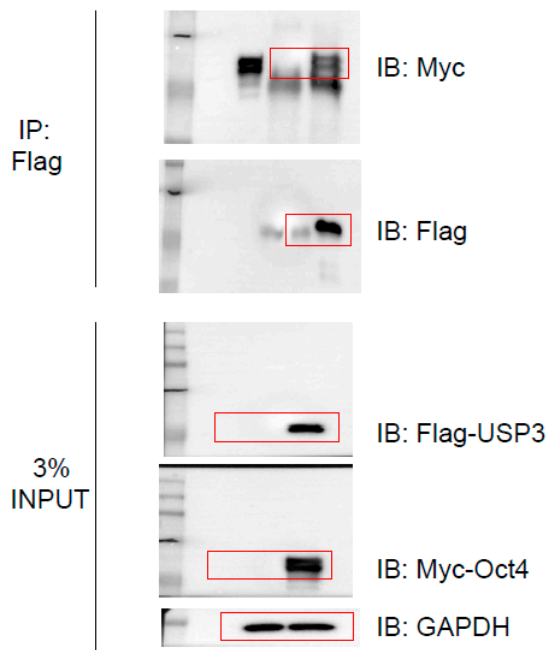

**Figure 3B**

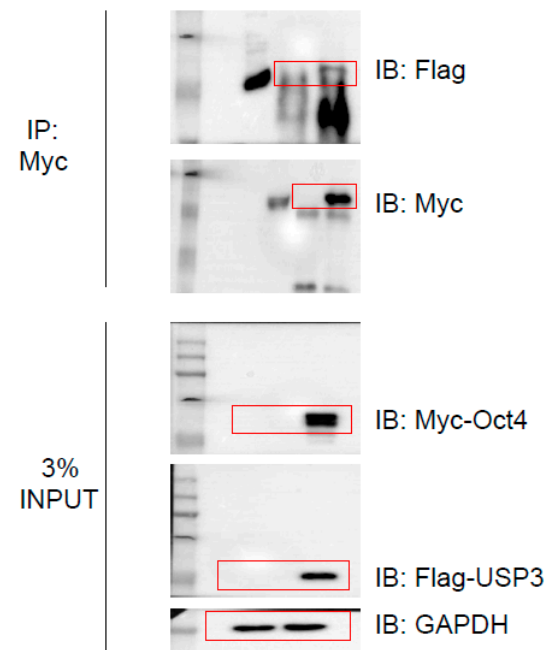

**Figure 3C**

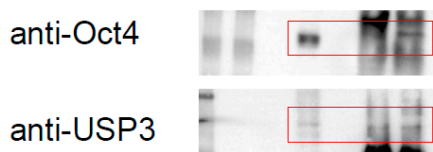

**Figure 3D**

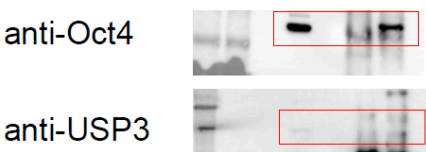

**Figure 4B**

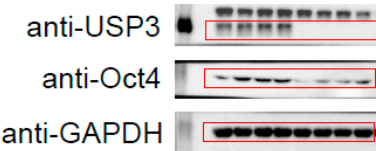

**Figure 4C**

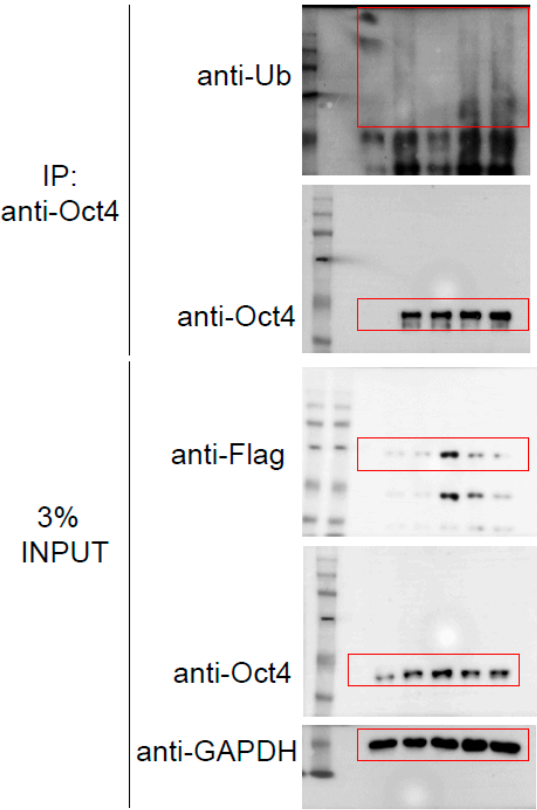

**Figure 4D**

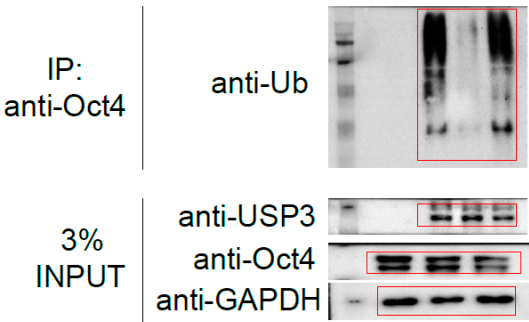

**Figure 4E**

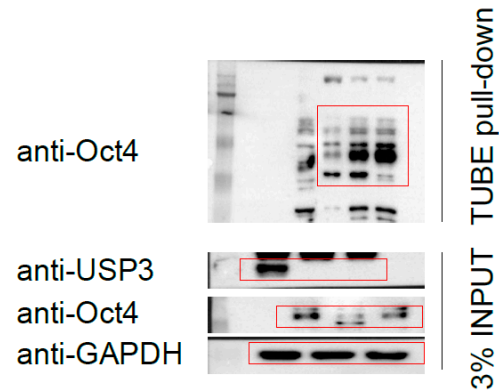



**Figure 5B**

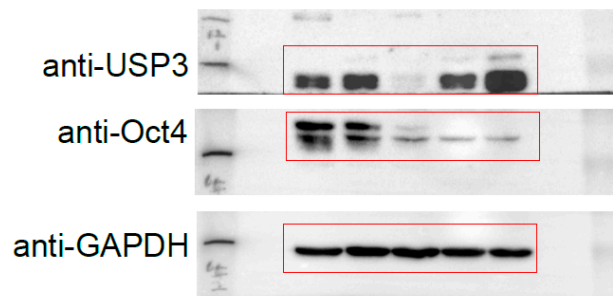

**Figure 5C**

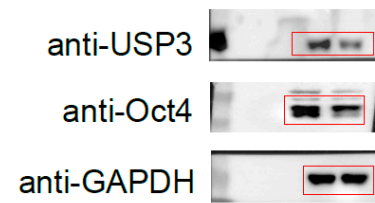

**Figure S3.** Triplicate images of western blots for significance values.

**Figure 2B**

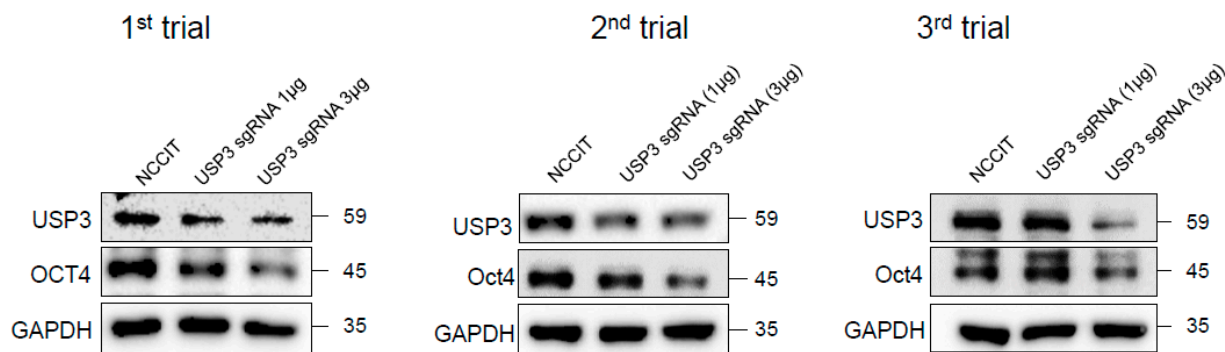

**Figure 2C**

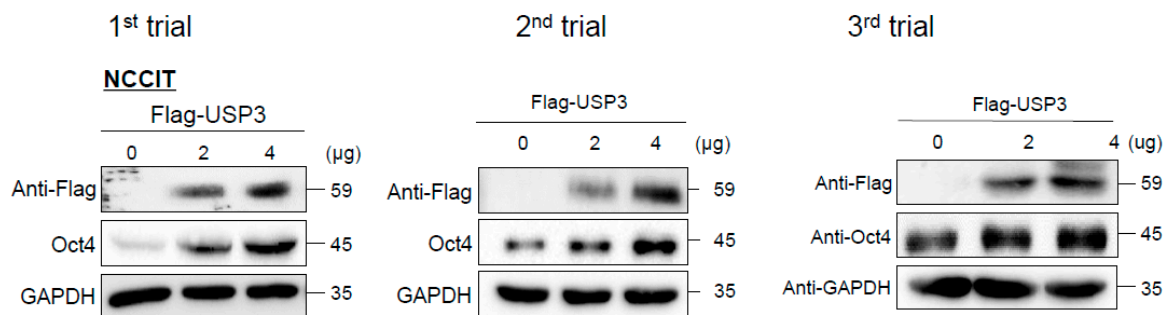

**Figure 2D**

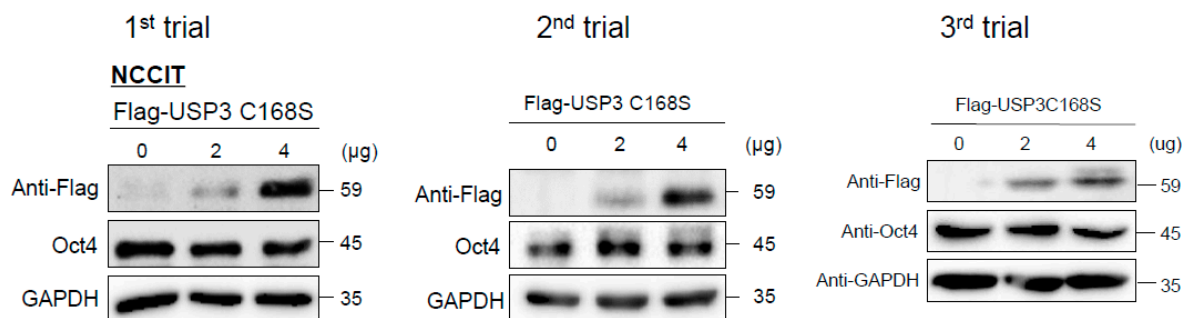

Figure 5C

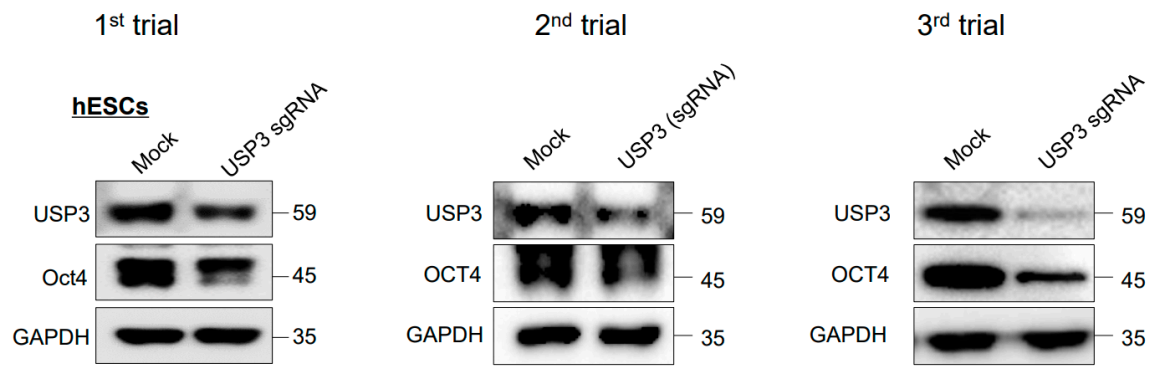

Supplement: s1 [file s1]
